# Supplementary material for: A High-Performance Liquid Chromatography with Electrochemical Detection Method Developed for the Sensitive Determination of Ascorbic Acid: Validation, Application, and Comparison with Titration, Spectrophotometric, and High-Performance Liquid Chromatography with Diode-Array Detection Methods
Source: MDPI journal article supplement (doi:10.3390/foods12163100), 2023-08-18
Supplement: s1 [file s1]

**Table S1.** The information of all test samples.

| No. | Samples                  | Species origin                                         | Geographical origin                 | Harvest date   |
|-----|--------------------------|--------------------------------------------------------|-------------------------------------|----------------|
| 1   | Multifloral honey (n=10) | <i>Apis cerana</i> , multifloral                       | Shaanxi                             | August 2017    |
| 2   | Multifloral honey (n=10) | <i>Apis cerana</i> , multifloral                       | Shaanxi                             | August 2019    |
| 3   | Multifloral honey (n=9)  | <i>Apis cerana</i> , multifloral                       | Shaanxi                             | September 2020 |
| 4   | Medlar honey (n=10)      | <i>Apis mellifera</i> , <i>Lycium chinense</i> Mill.   | Qinghai                             | November 2017  |
| 5   | Medlar honey (n=4)       | <i>Apis mellifera</i> , <i>Lycium chinense</i> Mill.   | Ningxia                             | November 2017  |
| 6   | Medlar honey (n=7)       | <i>Apis mellifera</i> , <i>Lycium chinense</i> Mill.   | Qinghai                             | November 2019  |
| 7   | Acacia honey (n=9)       | <i>Apis mellifera</i> , <i>Robinia pseudoacacia</i> L. | Yanan, Shaanxi                      | April 2017     |
| 8   | Acacia honey (n=9)       | <i>Apis mellifera</i> , <i>Robinia pseudoacacia</i> L. | Yanan, Shaanxi                      | May 2019       |
| 9   | Acacia honey (n=9)       | <i>Apis mellifera</i> , <i>Robinia pseudoacacia</i> L. | Yanan, Shaanxi                      | April 2020     |
| 10  | Kiwifruit (n=8)          | <i>Actinidia chinensis</i> Planch.                     | Meixian, Shaanxi                    | October 2020   |
| 11  | Kiwifruit (n=8)          | <i>Actinidia chinensis</i> Planch.                     | Zhouzhi, Shaanxi                    | October 2020   |
| 12  | Durian (n=5)             | <i>Durio zibethinus</i> Murr.                          | Guangdong                           | July 2020      |
| 13  | Durian (n=5)             | <i>Durio zibethinus</i> Murr.                          | Hainan                              | June 2020      |
| 14  | Banana (n=3)             | <i>Musa nana</i> Lour.                                 | Guangdong                           | December 2020  |
| 15  | Banana (n=6)             | <i>Musa nana</i> Lour.                                 | Guangxi                             | December 2020  |
| 16  | Serum (n=16)             | C57BL/6 male mice                                      | Experimental Animal Center of Xi'an | /              |
| 17  | Liver tissue (n=16)      | C57BL/6 male mice                                      | Jiaotong University                 | /              |
